# Supplementary material for: Association of Long COVID with mental health disorders: a retrospective cohort study using real-world data from the USA
Source: HighWire-hosted journal article supplement (doi:10.1136/bmjopen-2023-079267), 2024-02-01
Supplement: bmjopen-2023-079267supp002_data_supplement.pdf [file bmjopen-2023-079267supp002_data_supplement.pdf]

**Supplementary Table 1:** Diagnosis codes of the International Classification of Diseases 10th editions, Clinical Modification (ICD-10-CM), used to describe baseline/preexisting clinical medical conditions; and Current Procedural Terminology (CPT) code for COVID-19 vaccination status

| Variables                   | ICD-10 codes                                                                                           |
|-----------------------------|--------------------------------------------------------------------------------------------------------|
| Long COVID diagnosis        | U09.9                                                                                                  |
| Mental health disorders     | F10.x-F16.x, F17.x-F69.x, F80.x-F89.x, F90.x-F99.x                                                     |
| Myocardial Infarction       | I21.x, I22.x, I25.x,                                                                                   |
| Congestive Heart Failure    | I42.x, I43.x, I50.x,                                                                                   |
| Peripheral Vascular Disease | I70.x, I71.x, I73.x, I79.x, K55.x, Z95.x                                                               |
| Cerebrovascular Disease     | G45.x, G46.x, I60.x-I69.x                                                                              |
| Chronic Pulmonary Disease   | I27.x, J40.x-J47.x, J60.x-J68.x, J70.x                                                                 |
| Mild Liver Disease          | B18.x, K70.x, K71.x, K73.x, K74.x, K76.x, Z94.x                                                        |
| Diabetes                    | E10.x-E14.x                                                                                            |
| Renal Disease               | N03.x, N05.x, N18.x, N19.x, Z49.x                                                                      |
| Cancer (any malignancy)     | C00.x-C26.x, C30.x-C34.x, C37.x-C41.x, C43.x, C45.x-58.x, C60.x-C76.x, C81.x-C85.x, C88.x, C90.x-C97.x |

| Variables            | CPT codes                                                                                                                          |
|----------------------|------------------------------------------------------------------------------------------------------------------------------------|
| COVID-19 vaccination | "91300", "91305", "91307", "91308", "91301", "91306",<br>"91311", "91309", "91317", "91315", "91312", "91314",<br>"91316", "91313" |
