# Supplementary figures and images for: Association of Long COVID with mental health disorders: a retrospective cohort study using real-world data from the USA
Source: HighWire-hosted journal article supplement (doi:10.1136/bmjopen-2023-079267), 2024-02-01

**Supplemental Figure 1. Log-NegLog Survival Plot for checking proportional hazard assumption**

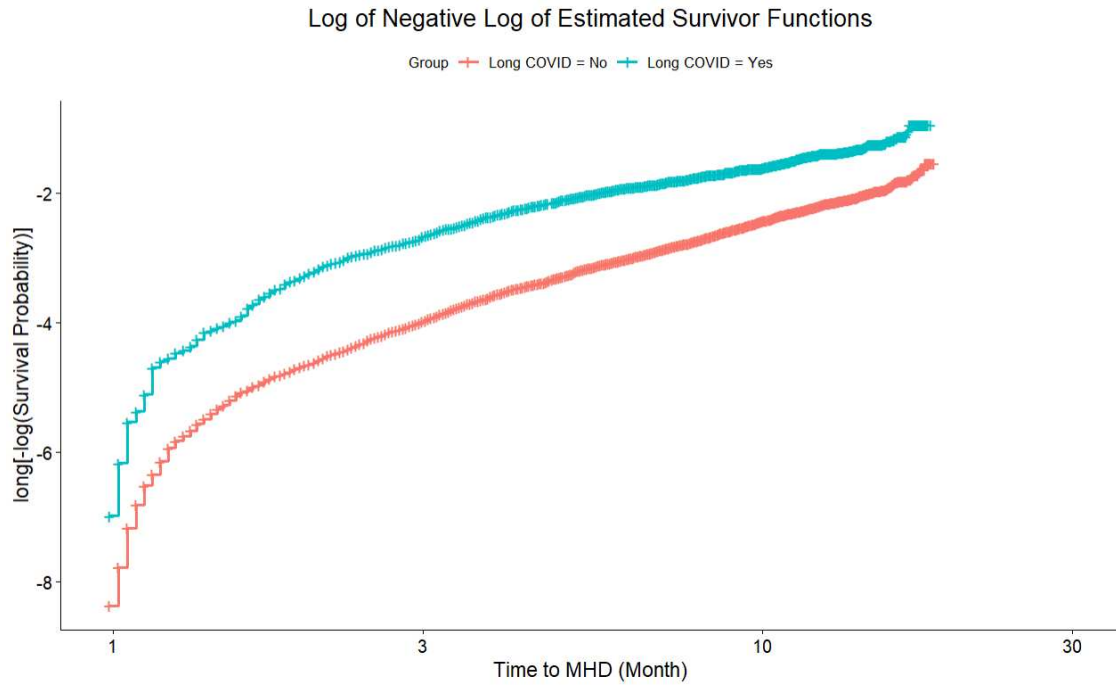

Supplement: bmjopen-2023-079267supp001_data_supplement.pdf [file bmjopen-2023-079267supp001_data_supplement.pdf]
